# Supplementary material for: miRNA-based buffering of the cobblestone–lissencephaly-associated extracellular matrix receptor dystroglycan via its alternative 3′-UTR
Source: PubMed Central journal article supplement — Nat Commun. 2014 Sep 18;5:4906. doi: 10.1038/ncomms5906 (PMC4199286; doi:10.1038/ncomms5906), 2014-09-18
Supplement: ncomms5906-s1.pdf [file ncomms5906-s1.pdf]

Supplementary Information  
Supplementary Figures and Legends

Supplementary Figure 1

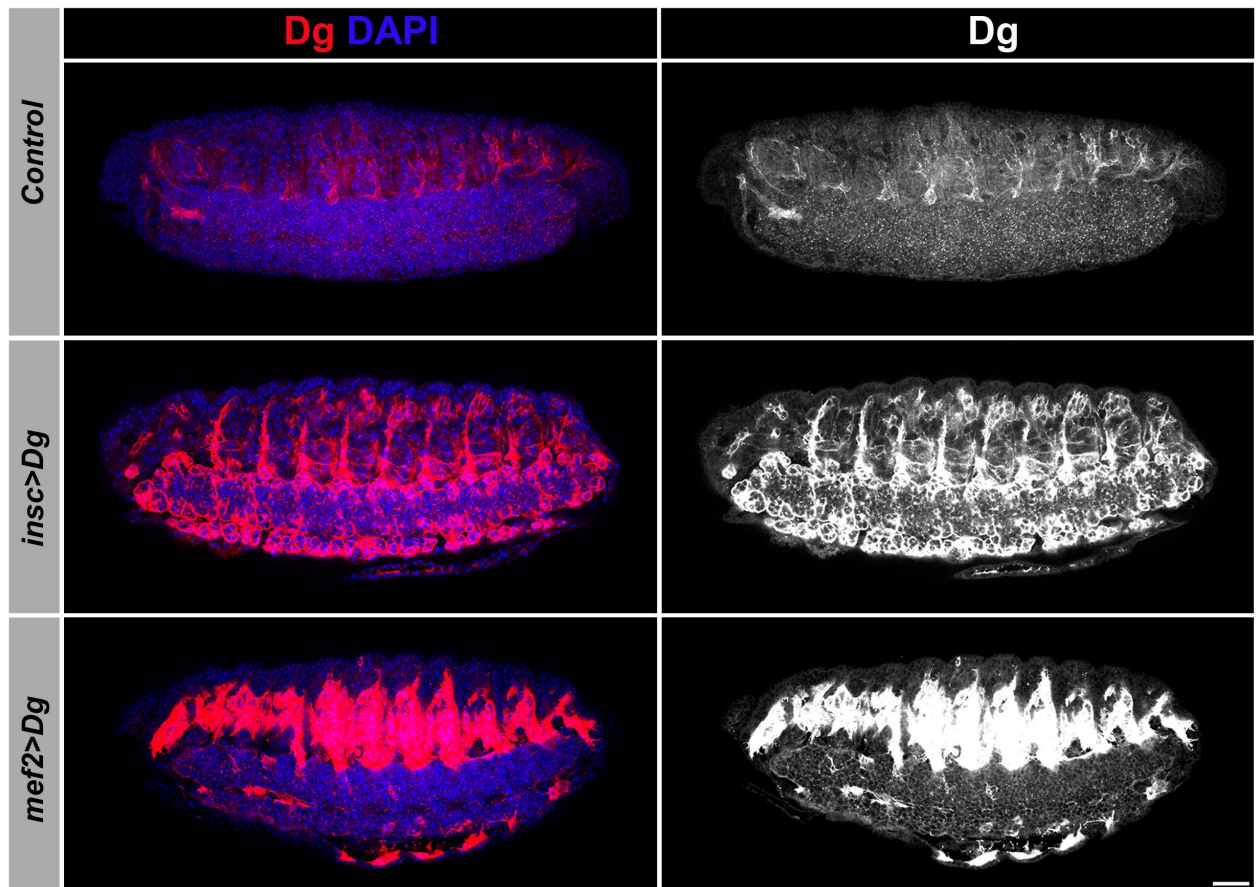

**Supplementary Figure 1. Tissue specific overexpression of Dg in *Drosophila* embryo**

High levels of Dg can be detected with specific Dg antibody in the nervous system of *insc>Dg* embryo and in muscles of *mef2>Dg* embryo compared to endogenous Dg levels in *Control*. Scale bar equals 25 $\mu$ m.

## Supplementary Figure 2

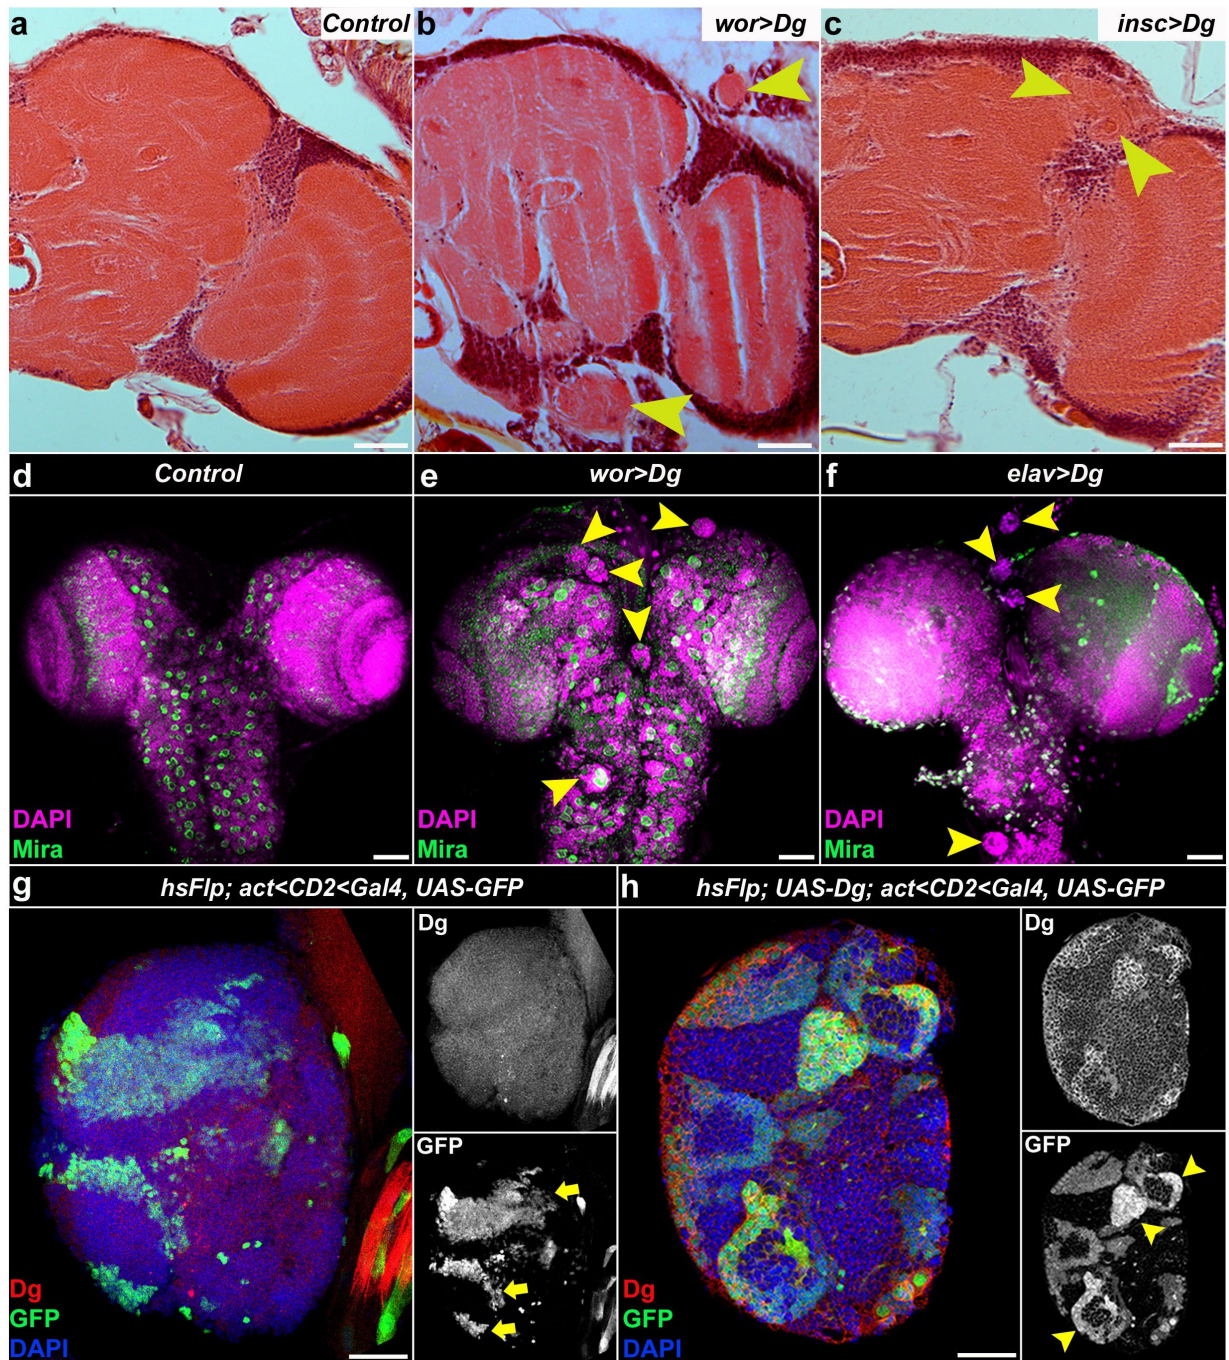

### Supplementary Figure 2. Dg levels are important for normal brain shape

**a-c**, Paraffin sections of the adult brains stained with haematoxylin and eosin show normal brain morphology in *control* flies (**a**), while in escapers, overexpression of Dg, using the neuroblast specific (*wor-Gal4*, **b**), and pan-neuronal (*insc-Gal4*, **c**) drivers, results in the appearance of dense round structures that outgrow the normal brain shape (yellow arrowheads). **d**, wild type larval brain has a smooth brain outline. **e-f**, Overexpression of Dg using neuroblast specific (**e**, *wor-Gal4*) or neuron specific (**f**, *elav-Gal4*) drivers results in the appearance of cobblestone-like structures (arrowheads). **g**, Control clones 3 days after clone induction (*hsFlp; act-FRT:CD2:FRT-Gal4, UAS-GFP*) marked by GFP spread uniformly in the brain. **h**, Clones with ectopic expression of Dg (*hsFlp; UAS-Dg; act-FRT:CD2:FRT-Gal4, UAS-GFP*) tend to round up, indicating a difference in cell adhesion relative to the surrounding wild type cells and form the early stage lumps (compare GFP channel in **g** and **h**). This indicates a difference in selective cell adhesion relative to the surrounding wild type cells and provides an explanation for the cause of lump formation. Scale bar equals 50µm in **a-c** and 25µm in **d-h**.

### Supplementary Figure 3

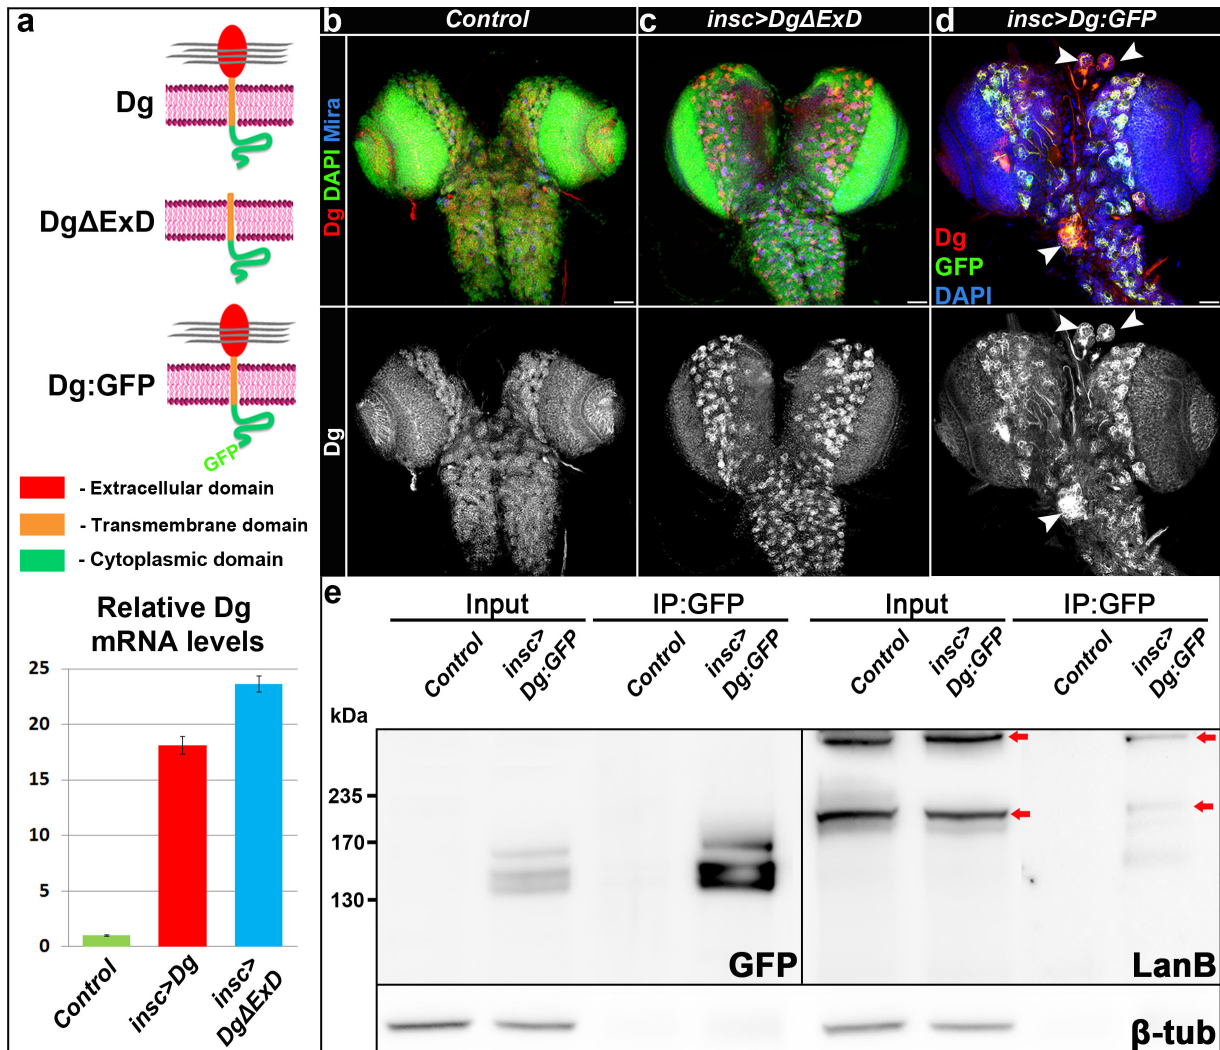

#### Supplementary Figure 3: Dg malformed brain phenotype results from abnormal interaction of the ECM-binding domain of Dg with neural lamella

**a**, The vertebrate Dg protein originates a single mRNA precursor that is cleaved post-translationally into  $\alpha$ - and  $\beta$ -Dg subunits<sup>1</sup>.  $\beta$ -Dg is a transmembrane protein that connects to the actin cytoskeleton via Dys and is associated with molecules involved in various signalling pathways<sup>2</sup>.  $\alpha$ -Dg is a peripheral membrane protein that connects to the ECM via its direct binding to extracellular molecules, such as laminins, perlecan, agrin, neuexins and via non-covalent interaction with the  $\beta$ -Dg subunit forms the link between the ECM and the cytoskeleton. Drosophila Dg does not undergo posttranslational cleavage; however it contains both functional domains. Overexpression of the ECM binding domain-depleted Dg isoform shows a similar increase in Dg mRNA levels, detected with primers against the region encoding for the C-terminal end of the Dg protein. Data represent two biological replicates (three technical replicate per each). See also Supplementary Table 4. **b-c**, Overexpression of truncated version of Dg that lacks the extracellular domain (*Dg $\Delta$ ExD*) using the *insc-Gal4* neuronal driver has no effect on the brain shape. **d**, Overexpression of GFP-tagged version of Dg using the *insc-Gal4* neuronal driver (*insc>Dg:GFP*) causes brain malformations (arrowheads). **e**, Western blot analysis on the samples from larval brains that express GFP-tagged Dg under control of the neuronal driver (*insc>Dg:GFP*). Pull-down using beads against the GFP tag showed that LanB can be detected in the Dg:GFP co-immunoprecipitation samples. This analysis shows that in *Drosophila* developing central nervous system, like in vertebrates, the ECM receptor Dg binds the ECM protein laminin. Scale bar equals 25 $\mu$ m in **b-d**.

## Supplementary Figure 4

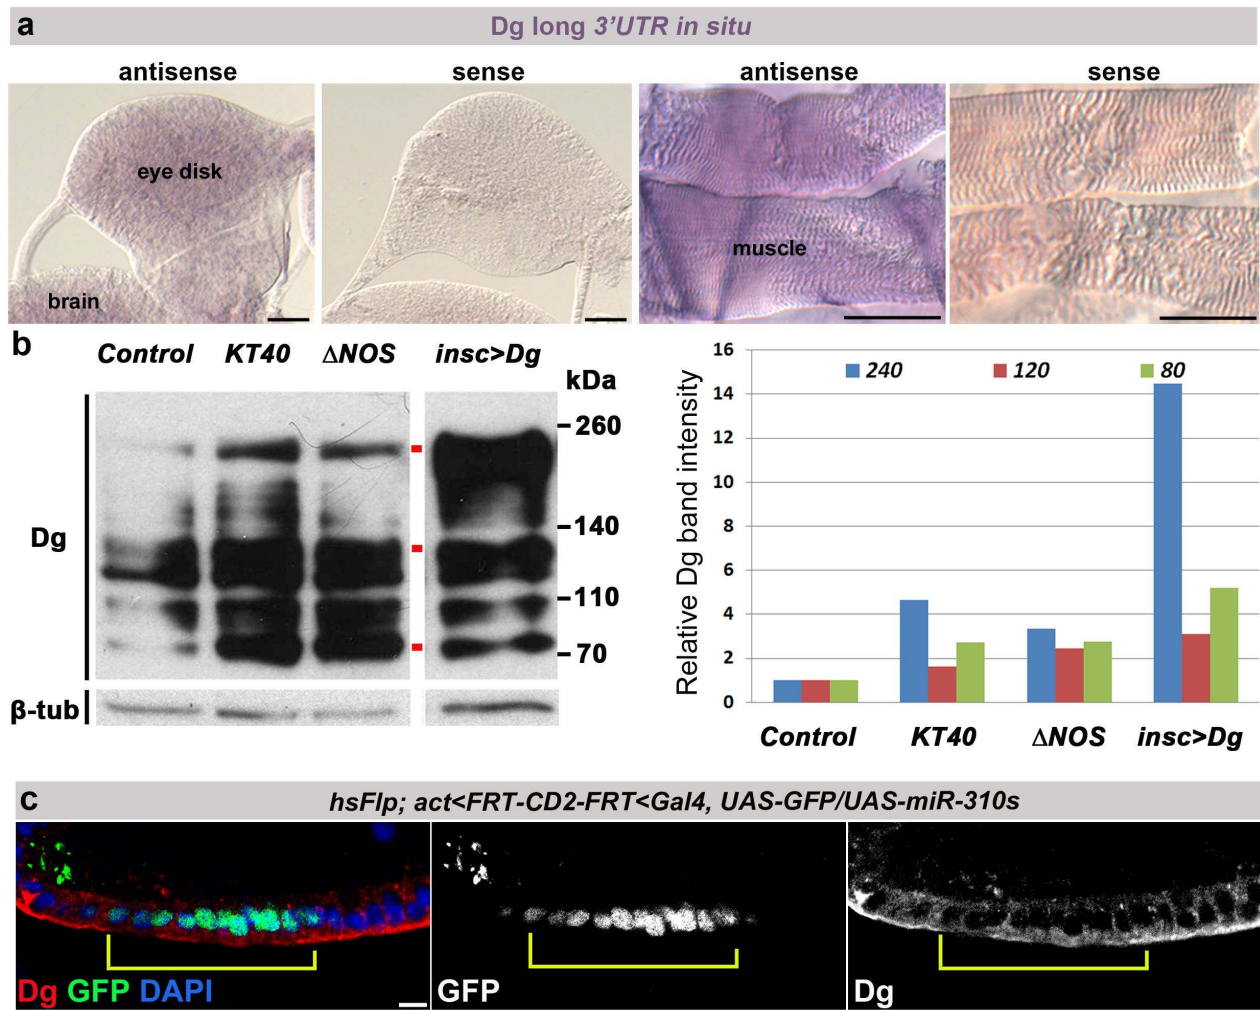

### Supplementary Figure 4. *Dg* mRNA with the long 3'UTR can be detected in total mRNA extracts and regulated by the *miR-310s* *in vivo*

**a**, *in situ* hybridization against the long 3'UTR region shows that this variant of *Dg* mRNA is present in larval muscle and eye disks. **b**, Western blot analysis from the whole larva protein extracts reveals that main *Dg* protein isoforms are upregulated in *miR-310s* and  $\Delta$ *NOS* mutants, compared to *Control*, measured by Image J software. Ectopic *Dg* expression in the nervous system leads to dramatic upregulation of *Dg* protein levels (~20 times). **c**, Ovarian follicle cell clones that ectopically express the *miR-310s* (*hsFlp; act<FRT-CD2-FRT<Gal4/+; UAS-GFP/UAS-miR-310s*) are used to measure *miR-310s* effect on *Dg* protein levels. *Dg* normally is localized to the basal side of the follicular epithelium; however, in *miR-310s* overexpressing cells, *Dg* expression levels at the basal side are decreased by approximately 30%, analysed by Image J software. Scale bar equals 25 $\mu$ m in **a** and 5 $\mu$ m in **c**.

### Supplementary Figure 5

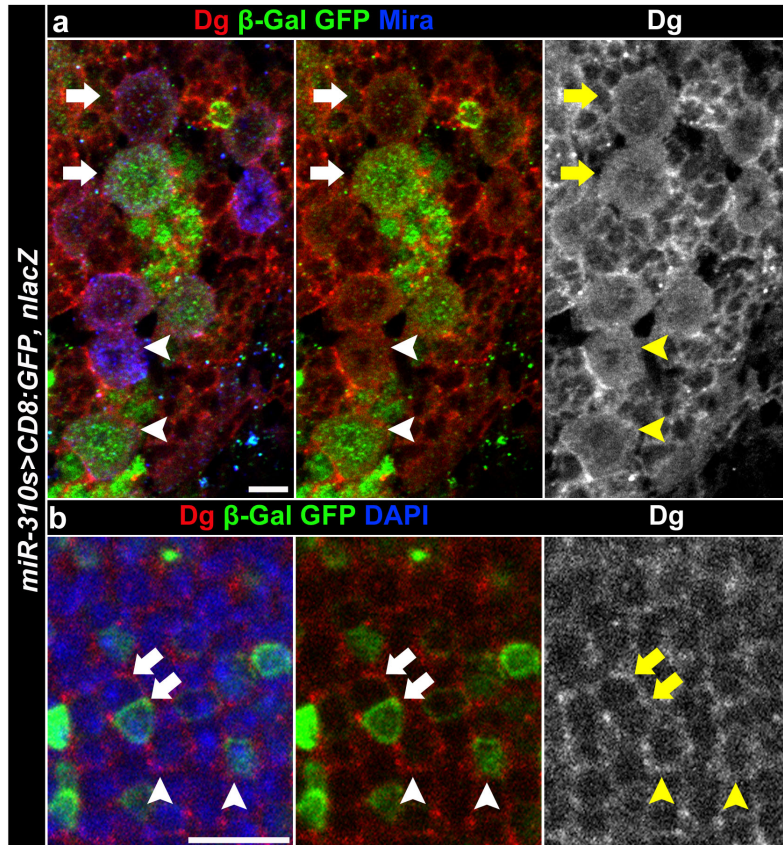

#### Supplementary Figure 5. Dg and *miR-310s* levels are dynamic in the larval NBs and photoreceptor cells

**a**, NBs that express *miR-310s* in the *Drosophila* larval brain have either high (arrowheads) or low (arrow) levels of Dg protein. **b**, Photoreceptor cells in the eye disk have high (arrowheads) or low (arrows) levels of Dg protein. Scale bar equals 5 $\mu$ m.

### Supplementary Figure 6

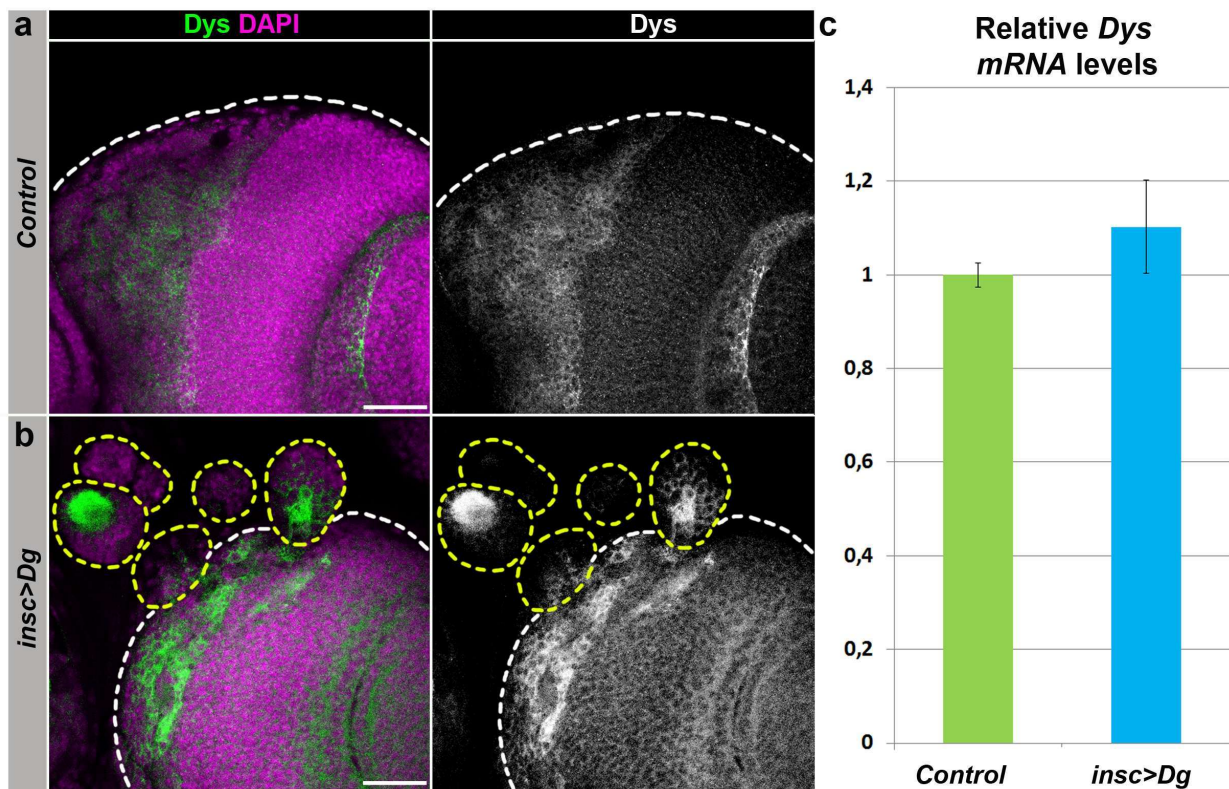

### Supplementary Figure 6. Dys protein, but not mRNA is upregulated in the brain lumps caused by Dg overexpression in the nervous system

**a-b**, Dys protein levels are upregulated in the lumps caused by Dg overexpression (**b**, *insc>Dg*) when compared to its endogenous levels in *Control* (**a**, *wt*). **c**, *Dys* mRNA levels from the whole larva mRNA extracts are not increased upon Dg overexpression in the nervous system. Data represent AVE±SD from two biological replicates (three technical replicates per each). See also Supplementary Table 4. Scale bar equals 25µm.

### Supplementary Figure 7

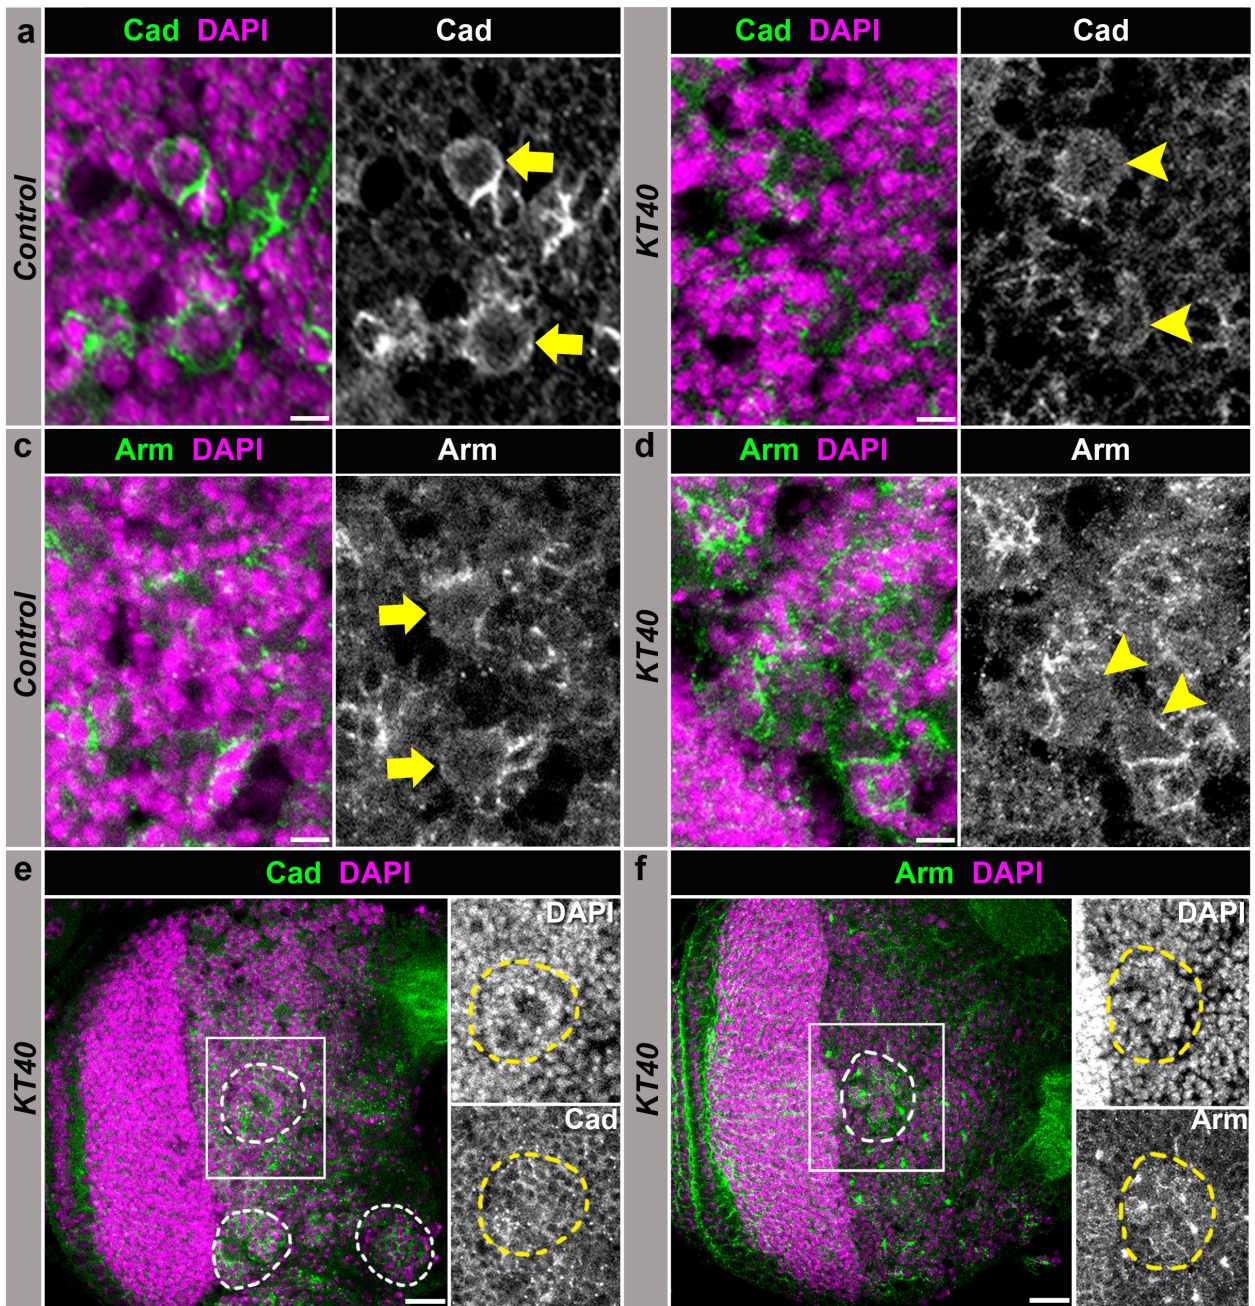

### Supplementary Figure 7. The cell adhesion proteins DE-Cadherin (Cad) and Armadillo (Arm) are misexpressed in the brain of *miR-310s* mutants

**a-b**, In *KT40* mutants, Cad levels are decreased in NBs (**b**, arrowheads), when compared to *Control* (**a**, arrows). **c-d**, In *KT40* mutants, Arm levels are increased in NBs (**d**, arrowheads), when compared to *Control* (**c**, arrows). **e-f**, The mild brain overgrowth phenotype in the *miR-310s* loss-of-function mutants. Brain lumps (indicated by dashed lines) in *miR-310s* mutants have abnormal localization of Cad (**e**) and Arm (**f**). Rectangles indicate magnified areas shown as separate single channel images to the right. Scale bar equals 5 μm in **a-d** and 25 μm in **e-f**.

## Supplementary Figure 8

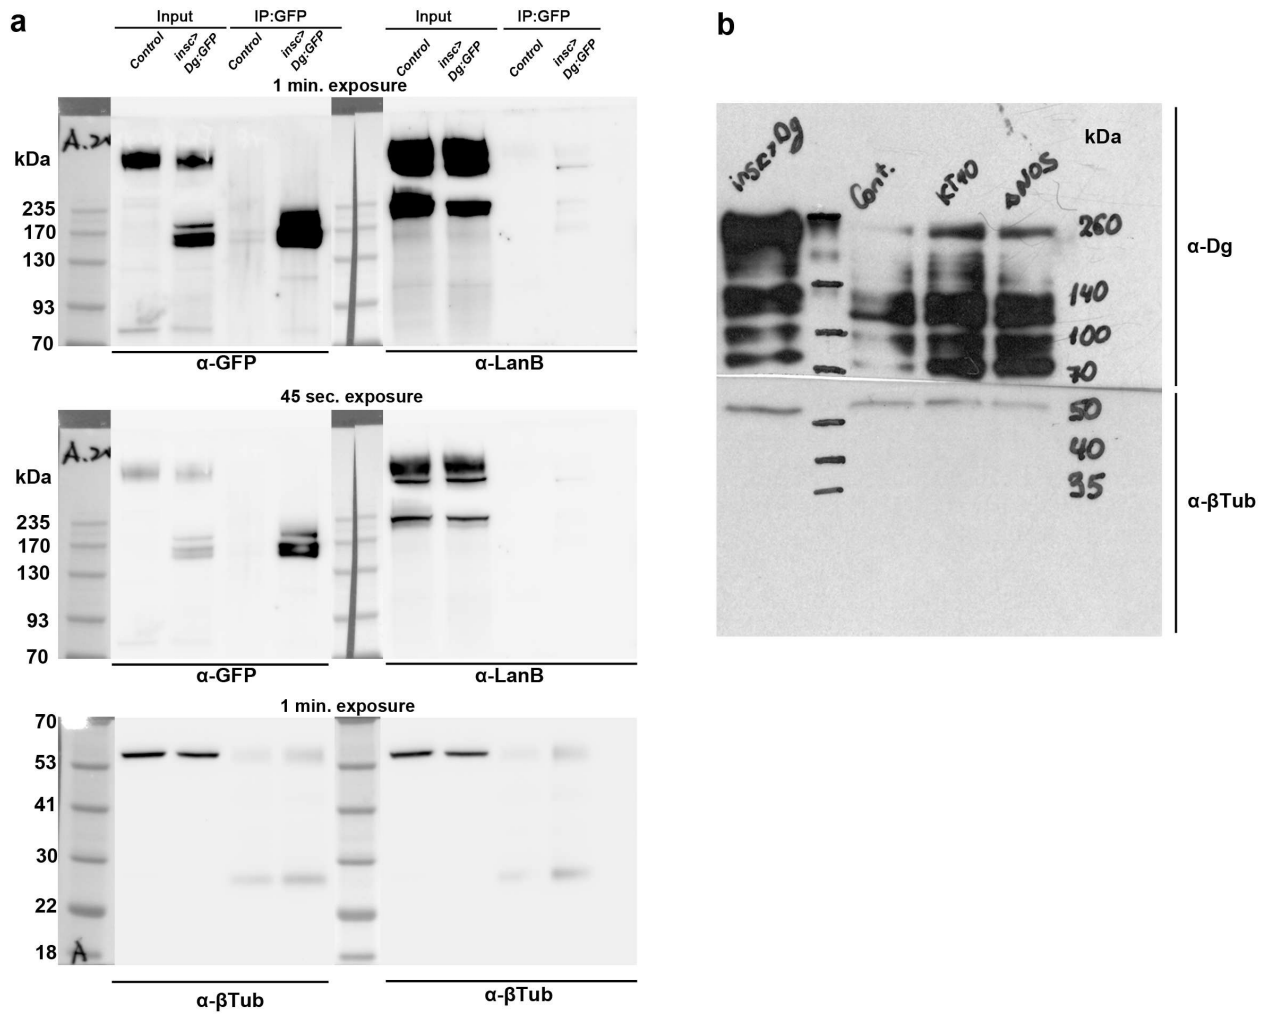

**Supplementary Figure 8. Original uncropped Western blots**

a, Related to Supplementary Figure 3. b, Related to Supplementary Figure 4.



## Supplementary Tables

**Supplementary Table 1: Dg levels are important for *Drosophila* survival**

| Cross                                                                                                                                                                            | number of eclosed non Cy adults | number of eclosed Cy adults | Survival, %           | AVE±AD Survival, %      | p-value                 |
|----------------------------------------------------------------------------------------------------------------------------------------------------------------------------------|---------------------------------|-----------------------------|-----------------------|-------------------------|-------------------------|
| <i>Control (CyO /+ x CyO /+)</i>                                                                                                                                                 | 30                              | 60                          | 100                   | 98.8±1.3                |                         |
|                                                                                                                                                                                  | 39                              | 80                          | 97.5                  |                         |                         |
| <i>CyO/Dg<sup>055</sup> x CyO/Dg<sup>055</sup></i>                                                                                                                               | 42                              | 209                         | 40.2                  | 37.4±2.8                | 2.0x10 <sup>-6***</sup> |
|                                                                                                                                                                                  | 39                              | 226                         | 34.5                  |                         |                         |
| <i>CyO/Dg<sup>055</sup> x CyO/ Dg<sup>038</sup></i>                                                                                                                              | 18                              | 123                         | 29.3                  | 29.7±0.4                | 4.0x10 <sup>-7***</sup> |
|                                                                                                                                                                                  | 22                              | 146                         | 30.1                  |                         |                         |
| <i>CyO/Dg<sup>055</sup> x CyO/Dg<sup>043</sup></i>                                                                                                                               | 25                              | 122                         | 41.0                  | 41.4±5.4                | 1.3x10 <sup>-3***</sup> |
|                                                                                                                                                                                  | 63                              | 243                         | 51.9                  |                         |                         |
| <i>CyO/Dg<sup>055</sup> x CyO/ Dg<sup>086</sup></i>                                                                                                                              | 11                              | 120                         | 18.3                  | 13.5±4.9                | 0***                    |
|                                                                                                                                                                                  | 4                               | 93                          | 8.6                   |                         |                         |
| Numbers reported are the AVE±AD. Statistics were calculated using two-way tables and significance was calculated using the chi-squared test: *p ≤ 0.05, **p ≤ 0.01, ***p ≤ 0.001 |                                 |                             |                       |                         |                         |
| Genotype                                                                                                                                                                         | number of biological replicates | number of embryos           | % embryonic lethality | p-value                 |                         |
| <i>Control (Oregon/ w<sup>1118</sup>)</i>                                                                                                                                        | 4                               | 435                         | 16.8±2.3              | -                       |                         |
| <i>tub&gt;Dg (UAS-Dg/+; tub-Gal4/+)</i><br><b>ubiquitous</b>                                                                                                                     | 2                               | -                           | 100                   | -                       |                         |
| <i>mef2&gt;Dg (UAS-Dg/+; mef2-Gal4/+)</i><br><b>muscle</b>                                                                                                                       | 2                               | 222                         | 14.5±5.0              | 0.46                    |                         |
| <i>insc&gt;Dg (insc-Gal4/UAS-Dg)</i><br><b>neuroblast</b>                                                                                                                        | 3                               | 779                         | 99.2±1.1              | 3.2x10 <sup>-8***</sup> |                         |
| <i>elav&gt;Dg (elav-Gal4/+; UAS-Dg/+)</i><br><b>pan-neuronal</b>                                                                                                                 | 3                               | 677                         | 59.7±15.4             | 0.002 **                |                         |
| <i>wor&gt;Dg (UAS-Dg/+; wor-Gal4/+)</i><br><b>neuroblast</b>                                                                                                                     | 4                               | 847                         | 80.0±7.6              | 5.2x10 <sup>-6***</sup> |                         |
| Numbers reported are the AVE±SD. Statistics were calculated using the two-tailed Student's t-test: *P ≤ 0.05, **P ≤ 0.01, ***P ≤ 0.001.                                          |                                 |                             |                       |                         |                         |

**Supplementary Table 2: Deregulation of DGC-NOS signalling leads to the brain malformation phenotypes**

| Genotype                                                                  | Brains with lumps (%) | Strength of observed phenotype | n, lobes analyzed | p-value <sup>t</sup>                                                                  |
|---------------------------------------------------------------------------|-----------------------|--------------------------------|-------------------|---------------------------------------------------------------------------------------|
| Control ( <i>w</i> <sup>1118</sup> )                                      | 0.00                  | ---                            | 16                |                                                                                       |
| <i>hsFlp;FRT42B GFP/<br/>FRT42B Dg</i> <sup>086</sup>                     | 42.11                 | weak                           | 19                | 0.0063 **                                                                             |
| <i>tub&gt;DgRNAi<br/>(tub-Gal4, UAS-DgRNAi)</i>                           | 5.88                  | weak                           | 18                | 0.263                                                                                 |
| <i>insc&gt;Dg (insc-Gal4/UAS-Dg)</i>                                      | 100.00                | strong                         | 16                | 1.1x10 <sup>-6</sup> ***                                                              |
| <i>insc&gt;Dg +NG<br/>(insc-Gal4/UAS-Dg +<br/>0.2ng/μl NG 5% sucrose)</i> | 84.21                 | strong                         | 19                | 4.8x10 <sup>-5</sup> ( <i>w</i> <sup>1118</sup> ) ***<br>0.3609 ( <i>insc&gt;Dg</i> ) |
| <i>KT40 (KT40/KT40)</i>                                                   | 45.24                 | weak                           | 84                | 0.0015 **                                                                             |
| <i>KT40; tub&gt;DgRNAi<br/>(KT40/KT40;<br/>tub-Gal4, UAS-DgRNAi)</i>      | 21.74                 | weak                           | 23                | 0.027 ( <i>w</i> <sup>1118</sup> ) *<br>0.025 ( <i>KT40</i> ) *                       |
| $\Delta$ NOS                                                              | 34.26                 | weak                           | 108               | 0.003 **                                                                              |
| $\Delta$ NOS+NG<br>( $\Delta$ NOS +<br>0.2ng/μl NG 5% sucrose)            | 28.00                 | weak                           | 25                | 0.012 ( <i>w</i> <sup>1118</sup> ) *<br>0.554 ( $\Delta$ NOS)                         |

Statistics were calculated using two-way tables and significance using the chi-squared test:

\*P ≤ 0.05, \*\*P ≤ 0.01, \*\*\*P ≤ 0.001.

For each experiment 3-5 independent crosses were analysed.

<sup>t</sup> Statistical comparisons were made to genotype *w*<sup>1118</sup> unless there is a genotype in parenthesis, in which case the comparison was made to that genotype.

**Supplementary Table 3: Luciferase activity assays show that the extended Dg 3'UTR can be targeted by the *miR-310s* family of miRNAs**

| Experiment | miRNA expression plasmid             | Renilla /Firefly luciferase ratio (psiCHECK-2) | Renilla /Firefly luciferase ratio (psiCHECK-2-Dg- P1,P2, P3-3'UTR) |             | Relative Luciferase levels (psiCHECK-2 Dg- P1,P2, P3 or P4-3'UTR /psiCHECK-2) | Relative Luciferase levels <sup>a</sup> | p-value  |
|------------|--------------------------------------|------------------------------------------------|--------------------------------------------------------------------|-------------|-------------------------------------------------------------------------------|-----------------------------------------|----------|
|            |                                      |                                                |                                                                    |             |                                                                               |                                         |          |
| I          | none <sup>a</sup>                    | 0.18 ± 0.02                                    | P1                                                                 | 0.10 ± 0.08 | 0.60 ± 0.45                                                                   | 1.00 ± 0.13                             |          |
|            |                                      |                                                | P2                                                                 | 0.09 ± 0.00 | 0.51 ± 0.01                                                                   | 1.00 ± 0.00                             |          |
|            |                                      |                                                | P3                                                                 | 0.22 ± 0.01 | 1.28 ± 0.06                                                                   | 1.00 ± 0.01                             |          |
|            | <i>miR-310s</i>                      | 0.30 ± 0.07                                    | P1                                                                 | 0.20 ± 0.02 | 0.67 ± 0.07                                                                   | 1.12 ± 0.03                             | 0.800    |
|            |                                      |                                                | P2                                                                 | 0.20 ± 0.11 | 0.67 ± 0.23                                                                   | 1.31 ± 0.21                             | 0.601    |
|            |                                      |                                                | P3                                                                 | 0.35 ± 0.14 | 1.17 ± 0.13                                                                   | 0.92 ± 0.03                             | 0.407    |
| II         | none <sup>a</sup>                    | 0.30 ± 0.06                                    | P4                                                                 | 0.22 ± 0.08 | 0.71±0.16                                                                     | 1.00 ± 0.23                             |          |
|            | <i>miR-310s</i>                      | 1.93 ± 0.59                                    |                                                                    | 0.35 ± 0.04 | 0.19±0.06                                                                     | 0.27 ± 0.08                             | 0.0095** |
|            | <i>miR-310</i>                       | 1.43 ± 0.90                                    |                                                                    | 0.25 ± 0.05 | 0.21±0.08                                                                     | 0.35 ± 0.01                             | 0.0031** |
|            | <i>miR-311</i>                       | 1.88 ± 0.05                                    |                                                                    | 0.41 ± 0.11 | 0.22±0.06                                                                     | 0.31 ± 0.08                             | 0.016*   |
|            | <i>miR-312</i>                       | 1.63 ± 0.22                                    |                                                                    | 0.53 ± 0.07 | 0.33±0.04                                                                     | 0.46 ± 0.05                             | 0.0067** |
|            | <i>miR-313</i>                       | 2.59 ± 0.43                                    |                                                                    | 0.39 ± 0.11 | 0.15±0.03                                                                     | 0.21 ± 0.04                             | 0.0018** |
| III        | none <sup>a</sup>                    | 0.68 ± 0.08                                    | P4                                                                 | 0.15 ± 0.03 | 0.22±0.02                                                                     | 1.00 ± 0.09                             |          |
|            | <i>miR-92a</i>                       | 2.04 ± 0.36                                    |                                                                    | 0.34 ± 0.07 | 0.17±0.01                                                                     | 0.77 ± 0.05                             | 0.015*   |
|            | <i>miR-92b (mutant)</i> <sup>c</sup> | 1.72 ± 0.30                                    |                                                                    | 0.47 ± 0.08 | 0.28±0.03                                                                     | 1.27 ± 0.13                             | 0.045*   |

The Firefly luciferase expression is used as an endogenous control where the Dg long 3'UTR was cloned into the *Renilla luciferase* gene.

<sup>a</sup> Values in the presence of miRNA expressing plasmids were normalized to the downregulation that occurred in cells with no miRNA expressing plasmid present.

<sup>b</sup> *miR-92a* and *miR-92b* were tested on a different day and therefore were compared to a different control sample.

<sup>c</sup> Note that *miR-92b* mutant plasmid has a point mutation in the seed sequence. Failure of *miR-92b (mutant)* to reduce the luciferase activity confirms the specificity of targeting.

AVE ± SD reported and significance was tested using a two-tailed Student's t-test: \*P ≤ 0.05, \*\*P ≤ 0.01, \*\*\*P ≤ 0.001.

**Supplementary Table 4: RT-qPCR analysis of *Dg*, *Dys* and miRNAs transcript levels**

| Genotype                                                          | <i>Dg</i> exon 14-15 Average C <sub>T</sub>            | <i>RpL32</i> Average C <sub>T</sub> | $\Delta C_T$ <i>Dg</i> – <i>RpL32</i> <sup>1</sup>       | $\Delta\Delta C_T$ ( $\Delta C_T - \Delta C_{T,control}$ <sup>2</sup> ) | Average <i>Dg</i> relative to control <sup>3</sup>       | <i>p</i> -value two-tailed Student's <i>t</i> -test |
|-------------------------------------------------------------------|--------------------------------------------------------|-------------------------------------|----------------------------------------------------------|-------------------------------------------------------------------------|----------------------------------------------------------|-----------------------------------------------------|
| <i>insc-Gal4</i> (larvae)                                         | 20.79±0.13                                             | 15.59±0.04                          | 5.21±0.13                                                | 0.00±0.13                                                               | 1.00±0.09                                                |                                                     |
| <i>insc-Gal4/UAS-Dg</i> (larvae)                                  | 16.83±0.07                                             | 15.81±0.14                          | 1.03±0.07                                                | -4.18±0.07                                                              | 18.14±0.83                                               | 3.7×10 <sup>-6</sup> ***                            |
| <i>insc-Gal4/UAS-DgExD</i> (larvae)                               | 16.43±0.05                                             | 15.79±0.12                          | 0.64±0.05                                                | -4.57±0.05                                                              | 23.76±0.75                                               | 8.2×10 <sup>-7</sup> ***                            |
| <i>w</i> <sup>1118</sup> (whole flies)                            | 21.60±0.13                                             | 16.28±0.21                          | 5.37±0.25                                                | -0.17±0.26                                                              | 1.01±0.16                                                |                                                     |
| <i>Oregon R</i> (whole flies)                                     | 21.72±0.18                                             | 15.87±0.04                          | 5.11±0.24                                                | -0.22±0.50                                                              | 0.90±0.12                                                | 0.41                                                |
| <i>Dg</i> <sup>O55</sup> / <i>Dg</i> <sup>O86</sup> (whole flies) | 23.36±0.72                                             | 15.70±0.67                          | 7.66±0.38                                                | 2.00±0.45                                                               | 0.26±0.08                                                | 0.0017**                                            |
| <i>KT40/KT40</i> (whole flies)                                    | 19.51±0.18                                             | 15.58±0.06                          | 3.94±0.12                                                | -1.60±0.12                                                              | 3.03±0.25                                                | 3.4×10 <sup>-6</sup> ***                            |
| <i>Oregon R</i> (whole flies)                                     | 21.24±0.12                                             | 15.41±0.08                          | 5.82±0.03                                                | 0.00±0.03                                                               | 1.00±0.02                                                |                                                     |
| $\Delta$ NOS (whole flies)                                        | 21.04±0.33                                             | 15.64±0.25                          | 5.40±0.24                                                | -0.43±0.24                                                              | 1.35±0.21                                                | 0.0455*                                             |
| <i>w</i> <sup>1118</sup> (heads)                                  | 23.15±0.34                                             | 16.06±0.09                          | 7.09±0.32                                                | 0.02±0.45                                                               | 1.02±0.22                                                |                                                     |
| <i>KT40/KT40</i> (heads)                                          | 21.06±0.06                                             | 16.48±0.32                          | 4.63±0.41                                                | -2.44±0.58                                                              | 5.66±1.57                                                | 0.0071**                                            |
| <i>w</i> <sup>1118</sup> (bodies)                                 | 20.80±0.49                                             | 16.26±0.16                          | 4.53±0.34                                                | 0.00±0.33                                                               | 1.02±0.22                                                |                                                     |
| <i>KT40/KT40</i> (bodies)                                         | 20.81±0.44                                             | 16.28±0.30                          | 4.53±0.14                                                | 0.00±0.14                                                               | 1.01±0.10                                                | 0.93                                                |
| <i>Oregon R</i> (whole flies, 29°C)                               | 19.62±0.11                                             | 14.74±0.09                          | 4.87±0.01                                                | 0.00±0.01                                                               | 1.00±0.01                                                |                                                     |
| <i>miR-310s-Gal4/UAS-Dg</i> (whole flies, 29°C)                   | 19.05±0.08                                             | 15.06±0.08                          | 4.00±0.04                                                | -0.88±0.04                                                              | 1.84±0.05                                                | 2.1×10 <sup>-4</sup> ***                            |
| <i>Oregon R</i> (larvae)                                          | 20.72±0.09                                             | 15.24±0.14                          | 5.49±0.07                                                | 0.00±0.07                                                               | 1.00±0.05                                                |                                                     |
| <i>miR-310s-Gal4/UAS-Dg</i> (larvae)                              | 15.38±0.05                                             | 14.22±0.16                          | 1.15±0.14                                                | -4.33±0.15                                                              | 20.23±2.01                                               | 7.8e-5***                                           |
| Genotype                                                          | <i>Dg-long</i> Average C <sub>T</sub>                  | <i>RpL32</i> Average C <sub>T</sub> | $\Delta C_T$ <i>Dg-long</i> – <i>RpL32</i> <sup>1</sup>  | $\Delta\Delta C_T$ ( $\Delta C_T - \Delta C_{T,control}$ <sup>2</sup> ) | Average <i>Dg-long</i> relative to control <sup>3</sup>  | <i>p</i> -value two-tailed Student's <i>t</i> -test |
| <i>w</i> <sup>1118</sup> (heads)                                  | 27.06±0.90                                             | 14.01±0.23                          | 13.04±0.76                                               | -0.00±0.76                                                              | 1.10±0.58                                                |                                                     |
| <i>KT40/KT40</i> (heads)                                          | 23.63±0.38                                             | 13.66±0.05                          | 9.96±0.34                                                | -3.09±0.34                                                              | 8.63±1.98                                                | 0.0032**                                            |
| <i>w</i> <sup>1118</sup> (bodies)                                 | 25.65±0.18                                             | 13.88±0.23                          | 11.78±0.04                                               | 0.00±0.04                                                               | 1.00±0.03                                                |                                                     |
| <i>KT40/KT40</i> (bodies)                                         | 24.65±0.16                                             | 14.42±0.05                          | 10.22±0.18                                               | -1.55±0.18                                                              | 2.95±0.37                                                | 0.0059**                                            |
| <i>w</i> <sup>1118</sup> (ovaries)                                | 28.33±0.16                                             | 13.10±0.45                          | 15.22±0.29                                               | 0.00±0.28                                                               | 1.01±0.20                                                |                                                     |
| <i>KT40/KT40</i> (ovaries)                                        | 27.11±0.26                                             | 12.77±0.18                          | 14.33±0.28                                               | -0.89±0.28                                                              | 1.88±0.36                                                | 0.057                                               |
| Genotype                                                          | <i>Dg-short</i> and <i>long</i> Average C <sub>T</sub> | <i>RpL32</i> Average C <sub>T</sub> | $\Delta C_T$ <i>Dg-short</i> – <i>RpL32</i> <sup>1</sup> | $\Delta\Delta C_T$ ( $\Delta C_T - \Delta C_{T,control}$ <sup>2</sup> ) | Average <i>Dg-short</i> relative to control <sup>3</sup> |                                                     |
| <i>w</i> <sup>1118</sup> (heads)                                  | 22.97±1.22                                             | 14.18±0.43                          | 8.48±0.68                                                | 0.00±0.68                                                               | 1.06±0.48                                                |                                                     |
| <i>KT40/KT40</i> (heads)                                          | 20.17±0.63                                             | 13.99±0.13                          | 6.19±0.53                                                | -2.29±0.53                                                              | 5.12±1.67                                                | 0.049*                                              |
| <i>w</i> <sup>1118</sup> (bodies)                                 | 20.21±0.43                                             | 14.64±0.23                          | 5.62±0.19                                                | 0.00±0.20                                                               | 1.01±0.13                                                |                                                     |
| <i>KT40/KT40</i> (bodies)                                         | 20.25±0.43                                             | 14.83±0.26                          | 5.36±0.72                                                | -0.25±0.72                                                              | 1.28±0.57                                                | 0.45                                                |
| Genotype                                                          | <i>Dys</i> Average C <sub>T</sub>                      | <i>RpL32</i> Average C <sub>T</sub> | $\Delta C_T$ <i>Dys</i> – <i>RpL32</i> <sup>1</sup>      | $\Delta\Delta C_T$ ( $\Delta C_T - \Delta C_{T,control}$ <sup>2</sup> ) | Average <i>Dys</i> relative to control <sup>3</sup>      | <i>p</i> -value two-tailed Student's <i>t</i> -test |
| <i>insc-Gal4</i> (larvae)                                         | 21.27±0.04                                             | 15.59±0.04                          | 5.68±0.04                                                | 0.00±0.04                                                               | 1.00±0.03                                                |                                                     |
| <i>insc-Gal4/UAS-Dg</i> (larvae)                                  | 21.36±0.13                                             | 15.81±0.14                          | 5.55±0.13                                                | -0.13±0.13                                                              | 1.10±0.10                                                | 0.278                                               |

| Genotype                                                          | <i>miR-312</i><br>Average C <sub>T</sub> | <i>2S rRNA</i><br>Average C <sub>T</sub> | $\Delta C_T$<br><i>miR-312</i> –<br><i>2s rRNA</i> <sup>1</sup> | $\Delta\Delta C_T$<br>( $\Delta C_T$ –<br>$\Delta C_{T,control}$ <sup>2</sup> ) | Average<br><i>miR-312</i><br>relative to<br>control <sup>3</sup> | <i>p</i> -value<br>two-tailed<br>Student's <i>t</i> -<br>test |
|-------------------------------------------------------------------|------------------------------------------|------------------------------------------|-----------------------------------------------------------------|---------------------------------------------------------------------------------|------------------------------------------------------------------|---------------------------------------------------------------|
| <i>Oregon R</i><br>(whole flies, 29°C)                            | 25.26±0.13                               | 8.51±0.38                                | 16.75±0.25                                                      | 0.00±0.25                                                                       | 1.01±0.18                                                        |                                                               |
| <i>miR-310s-Gal4/UAS-Dg</i><br>(whole flies, 29°C)                | 24.94±0.03                               | 9.74±0.26                                | 15.2±0.30                                                       | -1.55±0.30                                                                      | 2.96±0.61                                                        | 0.0056**                                                      |
| <i>Oregon R</i> (larvae)                                          | 28.55±0.15                               | 8.88±0.19                                | 19.67±0.21                                                      | 0.00±0.21                                                                       | 1.01±0.15                                                        |                                                               |
| <i>miR-310s-Gal4/UAS-Dg</i><br>(larvae)                           | 26.11±0.19                               | 8.88±0.18                                | 17.23±0.20                                                      | -2.44±0.20                                                                      | 5.47±0.78                                                        | 8.5x10 <sup>-5</sup> ***                                      |
| <i>Oregon R</i> (whole flies)                                     | 25.27±1.01                               | 6.89±1.08                                | 18.38±0.32                                                      | 0.00±0.32                                                                       | 1.02±0.23                                                        |                                                               |
| <i>Dg</i> <sup>O55</sup> / <i>Dg</i> <sup>O86</sup> (whole flies) | 24.97±0.78                               | 6.18±0.55                                | 18.78±0.24                                                      | 0.41±0.24                                                                       | 0.76±0.12                                                        | 0.037*                                                        |
| <i>KT40/KT40</i> (whole flies)                                    | 31.75±1.48                               | 6.01±0.25                                | 25.74±1.25                                                      | 7.36±1.25                                                                       | 0.01±0.01                                                        | 8.2x10 <sup>-5</sup> ***                                      |
| <i>Oregon R</i> (whole flies,<br>+5% sucrose)                     | 25.24±0.13                               | 8.53±0.14                                | 16.72±0.13                                                      | 0.00±0.13                                                                       | 1.00±0.09                                                        |                                                               |
| <i>Oregon R</i> (whole flies,<br>+0.2ng/μl NG 5%<br>sucrose)      | 24.40±0.16                               | 8.19±0.15                                | 16.21±0.16                                                      | -0.52±0.16                                                                      | 1.44±0.15                                                        | 0.0006***                                                     |
| <i>Oregon R</i> (larvae,<br>+5% sucrose)                          | 26.26±0.11                               | 7.60±0.02                                | 18.66±0.09                                                      | 0.00±0.09                                                                       | 1.00±0.06                                                        |                                                               |
| <i>Oregon R</i> (larvae,<br>+0.2ng/μl NG 5%<br>sucrose)           | 25.27±0.02                               | 7.64±0.06                                | 17.63±0.08                                                      | -1.03±0.08                                                                      | 2.04±0.11                                                        | 0.0073**                                                      |
| <i>w</i> <sup>1118</sup> (larvae)                                 | 26.11±0.13                               | 6.93±0.10                                | 19.18±0.17                                                      | 0.00±0.18                                                                       | 1.00±0.11                                                        |                                                               |
| $\Delta$ NOS (larvae)                                             | 26.79±0.28                               | 6.84±0.22                                | 19.95±0.23                                                      | 0.76±0.23                                                                       | 0.60±0.10                                                        | 0.0037**                                                      |
| <i>insc-Gal4</i> (larvae)                                         | 25.66±0.02                               | 5.64±0.12                                | 20.02±0.02                                                      | 0.00±0.02                                                                       | 1.00±0.01                                                        |                                                               |
| <i>insc-Gal4/UAS-SynRNAi</i><br>(larvae)                          | 26.14±0.03                               | 5.76±0.21                                | 20.38±0.03                                                      | 0.36±0.03                                                                       | 0.78±0.02                                                        | 0.0036**                                                      |
| <i>Oregon R</i> (larvae)                                          | 24.44±0.06                               | 5.76±0.07                                | 18.68±0.06                                                      | 0.00±0.06                                                                       | 0.96±0.04                                                        |                                                               |
| <i>insc-Gal4/UAS-Dg</i><br>(larvae)                               | 23.08±0.05                               | 5.75±0.06                                | 17.52±0.26                                                      | -1.16±0.26                                                                      | 2.26±0.40                                                        | 0.0001***                                                     |
| Genotype                                                          | <i>miR-310</i><br>Average C <sub>T</sub> | <i>2S rRNA</i><br>Average C <sub>T</sub> | $\Delta C_T$<br><i>miR-310</i> –<br><i>2s rRNA</i> <sup>1</sup> | $\Delta\Delta C_T$<br>( $\Delta C_T$ –<br>$\Delta C_{T,control}$ <sup>2</sup> ) | Average<br><i>miR-310</i><br>relative to<br>control <sup>3</sup> | <i>p</i> -value<br>two-tailed<br>Student's <i>t</i> -<br>test |
| <i>Oregon R</i> (whole flies,<br>+5% sucrose)                     | 23.74±0.14                               | 8.53±0.14                                | 15.22±0.14                                                      | 0.00±0.14                                                                       | 1.00±0.09                                                        |                                                               |
| <i>Oregon R</i> (whole flies,<br>+0.2ng/μl NG 5%<br>sucrose)      | 22.68±0.58                               | 8.19±0.15                                | 14.49±0.58                                                      | -0.72±0.58                                                                      | 1.76±0.73                                                        | 0.0048**                                                      |
| <i>Oregon R</i> (larvae,<br>+5% sucrose)                          | 25.53±0.00                               | 7.63±0.06                                | 17.93±0.00                                                      | 0.00±0.00                                                                       | 1.00±0.00                                                        |                                                               |
| <i>Oregon R</i> (larvae,<br>+0.2ng/μl NG 5%<br>sucrose)           | 24.34±0.03                               | 7.64±0.07                                | 16.70±0.03                                                      | -1.23±0.03                                                                      | 2.34±0.04                                                        | 0.0005***                                                     |
| <i>w</i> <sup>1118</sup> (larvae)                                 | 23.27±0.18                               | 6.73±0.16                                | 16.54±0.18                                                      | 0.00±0.18                                                                       | 1.00±0.13                                                        |                                                               |
| $\Delta$ NOS (larvae)                                             | 23.67±0.43                               | 6.66±0.12                                | 17.02±0.43                                                      | 0.48±0.43                                                                       | 0.74±0.22                                                        | 0.0540*                                                       |
| <i>insc-Gal4</i> (larvae)                                         | 24.86±0.07                               | 5.64±0.12                                | 19.22±0.06                                                      | 0.00±0.06                                                                       | 1.00±0.05                                                        |                                                               |
| <i>insc-Gal4/UAS-SynRNAi</i><br>(larvae)                          | 25.76±0.06                               | 5.76±0.21                                | 20.00±0.06                                                      | 0.78±0.06                                                                       | 0.58±0.02                                                        | 0.0001***                                                     |
| <i>Oregon R</i> (larvae)                                          | 24.90±0.03                               | 5.78±0.09                                | 19.13±0.03                                                      | 0.00±0.03                                                                       | 1.00±0.02                                                        |                                                               |
| <i>insc-Gal4/UAS-Dg</i><br>(larvae)                               | 23.10±0.12                               | 5.77±0.04                                | 17.33±0.12                                                      | -1.80±0.12                                                                      | 3.48±0.29                                                        | 0.0001***                                                     |

Reported numbers are AVE ± SD, and significance was tested using a two-tailed Student's *t*-test: \**P* ≤ 0.05, \*\**P* ≤ 0.01, \*\*\**P* ≤ 0.001.

**Supplementary Table 5: Dg levels correlate with the mitotic index of larval NBs**

| Genotype                                                                                                                                                                              | Number of lobes analysed | # EdU positive NBs | # EdU negative NBs | % EdU Positive NBs | p-value                           |
|---------------------------------------------------------------------------------------------------------------------------------------------------------------------------------------|--------------------------|--------------------|--------------------|--------------------|-----------------------------------|
| Control ( <i>w<sup>1118</sup></i> )                                                                                                                                                   | 14                       | 14.3 ± 1.6         | 16.3 ± 2.4         | 46.8 ± 3.9         |                                   |
| <i>Dg<sup>055</sup>/Dg<sup>055</sup></i>                                                                                                                                              | 17                       | 8.4 ± 2.4          | 18.0 ± 3.4         | 31.4 ± 5.7         | 2.8x10 <sup>-9***</sup>           |
| AVE ± SD are reported and significance was tested using a two-tailed Student's t-test: *p ≤ 0.05 **p ≤ 0.01 ***p ≤ 0.001.                                                             |                          |                    |                    |                    |                                   |
| Genotype                                                                                                                                                                              | Number of lobes analysed | # PH3 positive NBs | # PH3 negative NBs | % PH3 positive NBs | p-value <sup>†</sup>              |
| Control ( <i>w<sup>1118</sup></i> )                                                                                                                                                   | 8                        | 18.1 ± 5.1         | 23.9 ± 6.2         | 42.9 ± 2.6         |                                   |
| <i>KT40 (KT40/KT40)</i>                                                                                                                                                               | 8                        | 19.2 ± 4.6         | 19.1 ± 5.5         | 50.4 ± 9.3         | 0.048*                            |
| <i>KT40/DfExcel6070 (KT40/DfExcel6070)</i>                                                                                                                                            | 8                        | 23.8 ± 6.5         | 25.0 ± 5.1         | 48.3 ± 6.1         | 0.039*                            |
| <i>KT40; tub&gt;DgRNAi (KT40/KT40; tubGal4, UAS-DgRNAi)</i>                                                                                                                           | 8                        | 14.6 ± 2.7         | 31.4 ± 3.9         | 32.0 ± 6.0         | 3.0x10 <sup>-3***</sup>           |
| <i>tub&gt;DgRNAi (tubGal4, UAS-DgRNAi)</i>                                                                                                                                            | 6                        | 15.7 ± 3.4         | 30.3 ± 8.0         | 34.6 ± 7.3         | 0.015*                            |
| <i>miR-310s&gt;Dg (UAS-Dg/+; miR-310s-Gal4/+)</i>                                                                                                                                     | 6                        | 29.0 ± 6.9         | 19.0 ± 5.3         | 60.5 ± 6.5         | 1.4x10 <sup>-5***</sup>           |
| <i>miR-310s&gt; Khc-73 (miR-310s-Gal4/UAS-Khc-73)</i>                                                                                                                                 | 7                        | 16.3 ± 3.1         | 31.1 ± 5.0         | 34.5 ± 1.5         | 0.0068**                          |
| <i>miR-310s&gt;DgRNAi (miR-310s-Gal4/UAS-DgRNAi)</i>                                                                                                                                  | 10                       | 9.9 ± 0.7          | 33.6 ± 1.1         | 22.7 ± 4.7         | 8.3x10 <sup>-9***</sup>           |
| <i>Dg<sup>055</sup>/Dg<sup>055</sup></i>                                                                                                                                              | 8                        | 13.0 ± 3.7         | 29.5 ± 8.3         | 31.2 ± 9.2         | 0.0040**                          |
| <i>Sister clones hs Flp; FRT42B GFP/ FRT42B GFP</i>                                                                                                                                   | 17                       | 2.0 ± 0.7          | 2.82 ± 0.8         | 40.9 ± 5.8         | 0.449 ( <i>w<sup>1118</sup></i> ) |
| <i>Dg clones hs Flp; FRT42B GFP/ FRT42B Dg<sup>086</sup></i>                                                                                                                          | 17                       | 2.2 ± 0.75         | 4.6 ± 1.4          | 33.3 ± 8.6         | 0.020* ( <i>sister clones</i> )   |
| AVE ± SD are reported and significance was tested using the two-tailed Student's t-test: *P ≤ 0.05, **P ≤ 0.01, ***P ≤ 0.001.                                                         |                          |                    |                    |                    |                                   |
| <sup>†</sup> Statistical comparisons were made to genotype <i>w<sup>1118</sup></i> unless there is a genotype in parenthesis, in which case the comparison was made to that genotype. |                          |                    |                    |                    |                                   |

**Supplementary Table 6: *miR-310s* and *Dg* misexpression leads to the premature termination of photoreceptor axon projections**

| Genotype                                                                              | Defective lamina plexuses (%) | n, analyzed optic lobes | p-value <sup>†</sup>                                                         |
|---------------------------------------------------------------------------------------|-------------------------------|-------------------------|------------------------------------------------------------------------------|
| Control ( <i>w</i> <sup>1118</sup> )                                                  | 5.9 ± 5.6                     | 52                      |                                                                              |
| Control ( <i>KT40/+</i> )                                                             | 6.1 ± 5.3                     | 55                      | 0.49                                                                         |
| <i>KT40</i><br>( <i>KT40/KT40</i> )                                                   | 62.4 ± 3.7                    | 61                      | 6.4x10 <sup>-5***</sup>                                                      |
| <i>KT40; GMR&gt;miR-310s</i><br>( <i>KT40/KT40;</i><br><i>GMR-Gal4/UAS-miR-310s</i> ) | 3.6 ± 5.1                     | 25                      | 3.0x10 <sup>-4***</sup> ( <i>KT40</i> )<br>0.33 ( <i>w</i> <sup>1118</sup> ) |
| <i>GMR-Gal4</i> (Control)                                                             | 8.2 ± 1.2                     | 60                      | 0.27                                                                         |
| <i>GMR&gt;miR-310s</i><br>( <i>GMR-Gal4/UAS-miR310s</i> )                             | 7.6 ± 1.2                     | 40                      | 0.29                                                                         |
| <i>miR-310s&gt;Dg</i><br>( <i>UAS-Dg/+; miR-310s-Gal4/+</i> )                         | 40.8 ± 8.7                    | 39                      | 0.0022**                                                                     |
| <i>GMR&gt;Dg</i><br>( <i>UAS-Dg; GMR-Gal4</i> )                                       | 75.1 ± 2.5                    | 96                      | 2.8x10 <sup>-4***</sup>                                                      |
| <i>KT40; GMR&gt;DgRNAi</i><br>( <i>KT40/KT40; GMR-Gal4/UAS-</i><br><i>DgRNAi</i> )    | 36.2 ± 8.0                    | 49                      | 0.0034** ( <i>KT40</i> )<br>0.0029** ( <i>w</i> <sup>1118</sup> )            |
| <i>GMR&gt;DgRNAi</i><br>( <i>GMR-Gal4/UAS-DgRNAi</i> )                                | 12.1 ± 3.0                    | 51                      | 0.258                                                                        |

The experiment was conducted using three different bouts of progeny from independent crosses. Each experimental round consisted of between 5 and 20 optic lobe examinations being marked as disturbed or normal to generate an experimental percentage per biological replicate.

AVE ± SD reported and statistical significance was tested using the one-tailed Student's t-test:

\*P ≤ 0.05, \*\*P ≤ 0.01, \*\*\*P ≤ 0.001.

<sup>†</sup> Statistical comparisons were made to genotype *w*<sup>1118</sup> unless there is a genotype in parenthesis, in which case the comparison was made to that genotype.

**Supplementary Table 7: NO amounts are altered in *Dg* and NOS mutants**

| Genotype                                                 | Relative NO levels<br>(Total Nitrite/Nitrate) | p-value |
|----------------------------------------------------------|-----------------------------------------------|---------|
| Control ( <i>insc-Gal4</i> )                             | 1.00 ± 0.07                                   |         |
| <i>NG</i> ( <i>insc-Gal4</i> +0.2ng/μl NG in 5% sucrose) | 1.20 ± 0.17                                   | 0.049*  |
| $\Delta$ NOS                                             | 0.75 ± 0.19                                   | 0.028*  |
| <i>insc&gt;Dg</i> ( <i>insc-Gal4/UAS-Dg</i> )            | 1.25 ± 0.12                                   | 0.001** |

AVE ± SD reported from the measurements done from 3-6 independent experiments and statistical significance was tested using two sample z-statistics: \*P ≤ 0.05, \*\*P ≤ 0.01, \*\*\*P ≤ 0.001.

**Supplementary References**

1. Barresi, R. & Campbell, K.P. Dystroglycan: from biosynthesis to pathogenesis of human disease. *J Cell Sci* **119**, 199-207 (2006).
2. Cohn, R.D. Dystroglycan: important player in skeletal muscle and beyond. *Neuromuscul.Disord.* **15**, 207-217 (2005).
